# Supplementary material for: Current Concentrations of Zn, Cu, and As in Piggery Wastewater Compromise Nutrient Removals in Microalgae–Bacteria Photobioreactors Due to Altered Microbial Communities
Source: Biology (Basel). 2022 Aug 5;11(8):1176. doi: 10.3390/biology11081176 (PMC9405037; doi:10.3390/biology11081176)
Supplement: Supplementary file 1 [file biology-11-01176-s001.zip › Table S6_simper_results.xlsx]

## Sheet: simper_KW_results.signf.txt
ASV	Taxonomy	Comparison	SIMPER	p-value	adjusted p-value	Left mean abundance	Left sd	Right mean abundance	Right sd
ASV228	p__Firmicutes;c__Bacilli;o__Bacillales;f__Planococcaceae;g__Lysinibacillus;g__Lysinibacillus	R-control_R-As	0.098869	0.00534568	0.0322266	0	0	0.070133	0.0848358
ASV507	p__Proteobacteria;c__Gammaproteobacteria;o__Burkholderiales;f__Comamonadaceae;f__Comamonadaceae;f__Comamonadaceae	R-control_R-As	0.0153458	0.00902344	0.0322266	0.00180988	0.000944654	0.0122648	0.0068295
ASV523	p__Proteobacteria;c__Gammaproteobacteria;o__Burkholderiales;f__Rhodocyclaceae;g__Azovibrio;g__Azovibrio	R-control_R-As	0.0129349	0.00534568	0.0322266	0.0114739	0.0144876	0	0
ASV542	p__Proteobacteria;c__Gammaproteobacteria;o__Pseudomonadales;f__Moraxellaceae;g__Acinetobacter;g__Acinetobacter	R-control_R-As	0.0179591	0.00902344	0.0322266	0.0046992	0.0016465	0.0169471	0.0135709
ASV424	p__Proteobacteria;c__Alphaproteobacteria;o__Caulobacterales;f__Caulobacteraceae;g__Brevundimonas;g__Brevundimonas	R-control_R-Cu	0.127188	0.00902344	0.0322266	0.00140634	0.000387086	0.201573	0.133622
ASV442	p__Proteobacteria;c__Alphaproteobacteria;o__Reyranellales;f__Reyranellaceae;g__Reyranella;g__Reyranella	R-control_R-Cu	0.0132924	0.00902344	0.0322266	0.0267676	0.00915594	0.00229598	0.00310003
ASV482	p__Proteobacteria;c__Alphaproteobacteria;o__Sphingomonadales;f__Sphingomonadaceae;g__Sphingosinicella;g__Sphingosinicella	R-control_R-Cu	0.0116127	0.00902344	0.0322266	0.000141646	8.74517e-05	0.0187509	0.0165072
ASV483	p__Proteobacteria;c__Alphaproteobacteria;o__Tistrellales;f__Tistrellaceae;g__Tistrella;s__Tistrella_mobilis	R-control_R-Cu	0.198007	0.00902344	0.0322266	0.437832	0.0763775	0.0692428	0.0843885
ASV511	p__Proteobacteria;c__Gammaproteobacteria;o__Burkholderiales;f__Comamonadaceae;g__Delftia;g__Delftia	R-control_R-Cu	0.0964245	0.00902344	0.0322266	0.00679264	0.00854894	0.162776	0.153424
ASV526	p__Proteobacteria;c__Gammaproteobacteria;o__Burkholderiales;f__Rhodocyclaceae;g__Thauera;g__Thauera	R-control_R-Cu	0.0126297	0.0162936	0.0424313	0.0253956	0.0206156	0.00191845	0.00236094
ASV563	p__Proteobacteria;c__Gammaproteobacteria;o__Xanthomonadales;f__Rhodanobacteraceae;g__uncultured;g__uncultured	R-control_R-Cu	0.0328208	0.0162936	0.0424313	0.0677211	0.0302382	0.0079364	0.0132099
ASV610	p__Verrucomicrobiota;c__Verrucomicrobiae;o__Verrucomicrobiales;f__Verrucomicrobiaceae;g__Verrucomicrobium;g__Verrucomicrobium	R-control_R-Cu	0.0376271	0.00861071	0.0322266	0.068441	0.0110361	0.000126729	0.000241007
ASV41	p__Bacteroidota;c__Bacteroidia;o__Bacteroidales;f__Bacteroidaceae;g__Bacteroides;s__uncultured_prokaryote	R-control_R-Zn	0.0265018	0.00902344	0.0322266	0.00405052	0.001551	0.040762	0.0154066
ASV57	p__Bacteroidota;c__Bacteroidia;o__Bacteroidales;f__Dysgonomonadaceae;g__Proteiniphilum;s__uncultured_prokaryote	R-control_R-Zn	0.0121872	0.00902344	0.0322266	0.00209013	0.000604776	0.0189537	0.00724347
ASV235	p__Firmicutes;c__Bacilli;o__Erysipelotrichales;f__Erysipelatoclostridiaceae;g__UCG-004;s__uncultured_bacterium	R-control_R-Zn	0.0190789	0.00902344	0.0322266	0.00348187	0.00114008	0.0299295	0.013857
ASV424	p__Proteobacteria;c__Alphaproteobacteria;o__Caulobacterales;f__Caulobacteraceae;g__Brevundimonas;g__Brevundimonas	R-control_R-Zn	0.0404383	0.00902344	0.0322266	0.00140634	0.000387086	0.0584734	0.0281905
ASV425	p__Proteobacteria;c__Alphaproteobacteria;o__Caulobacterales;f__Caulobacteraceae;g__Caulobacter;g__Caulobacter	R-control_R-Zn	0.0177273	0.00820774	0.0322266	5.42687e-05	7.65191e-05	0.025041	0.0256984
ASV442	p__Proteobacteria;c__Alphaproteobacteria;o__Reyranellales;f__Reyranellaceae;g__Reyranella;g__Reyranella	R-control_R-Zn	0.0128195	0.0162936	0.0424313	0.0267676	0.00915594	0.00481315	0.00666341
ASV483	p__Proteobacteria;c__Alphaproteobacteria;o__Tistrellales;f__Tistrellaceae;g__Tistrella;s__Tistrella_mobilis	R-control_R-Zn	0.194833	0.00902344	0.0322266	0.437832	0.0763775	0.0951782	0.112795
ASV511	p__Proteobacteria;c__Gammaproteobacteria;o__Burkholderiales;f__Comamonadaceae;g__Delftia;g__Delftia	R-control_R-Zn	0.131171	0.00902344	0.0322266	0.00679264	0.00854894	0.189796	0.102302
ASV552	p__Proteobacteria;c__Gammaproteobacteria;o__Pseudomonadales;f__Pseudomonadaceae;g__Pseudomonas;g__Pseudomonas	R-control_R-Zn	0.0101554	0.0162936	0.0424313	0.00363007	0.00313824	0.0171684	0.0133995
ASV579	p__Spirochaetota;c__Spirochaetia;o__Spirochaetales;f__Spirochaetaceae;g__Sphaerochaeta;s__uncultured_bacterium	R-control_R-Zn	0.0127455	0.00902344	0.0322266	0.000657034	0.000408459	0.0185977	0.00760341
ASV610	p__Verrucomicrobiota;c__Verrucomicrobiae;o__Verrucomicrobiales;f__Verrucomicrobiaceae;g__Verrucomicrobium;g__Verrucomicrobium	R-control_R-Zn	0.0396726	0.00902344	0.0322266	0.068441	0.0110361	0.00177622	0.00277854
ASV13	p__Acidobacteriota;c__Blastocatellia;o__Blastocatellales;f__Blastocatellaceae;f__Blastocatellaceae;f__Blastocatellaceae	R-Cu_R-As	0.010935	0.0162936	0.0424313	0.00280505	0.00526212	0.0192336	0.00907249
ASV115	p__Bacteroidota;c__Bacteroidia;o__Chitinophagales;f__Chitinophagaceae;g__Edaphobaculum;g__Edaphobaculum	R-Cu_R-As	0.0185637	0.0162936	0.0424313	0.000870095	0.00170164	0.0298558	0.0179509
ASV228	p__Firmicutes;c__Bacilli;o__Bacillales;f__Planococcaceae;g__Lysinibacillus;g__Lysinibacillus	R-Cu_R-As	0.0433167	0.0150186	0.0424313	0.000905943	0.00199817	0.070133	0.0848358
ASV402	p__Planctomycetota;c__Phycisphaerae;o__Phycisphaerales;f__Phycisphaeraceae;g__SM1A02;g__SM1A02	R-Cu_R-As	0.0153253	0.0150186	0.0424313	0.001206	0.00264966	0.0251891	0.0163489
ASV424	p__Proteobacteria;c__Alphaproteobacteria;o__Caulobacterales;f__Caulobacteraceae;g__Brevundimonas;g__Brevundimonas	R-Cu_R-As	0.113085	0.00902344	0.0322266	0.201573	0.133622	0.00418982	0.00302224
ASV482	p__Proteobacteria;c__Alphaproteobacteria;o__Sphingomonadales;f__Sphingomonadaceae;g__Sphingosinicella;g__Sphingosinicella	R-Cu_R-As	0.0104904	0.00902344	0.0322266	0.0187509	0.0165072	9.78137e-05	8.35978e-05
ASV483	p__Proteobacteria;c__Alphaproteobacteria;o__Tistrellales;f__Tistrellaceae;g__Tistrella;s__Tistrella_mobilis	R-Cu_R-As	0.14205	0.0162936	0.0424313	0.0692428	0.0843885	0.283426	0.125055
ASV511	p__Proteobacteria;c__Gammaproteobacteria;o__Burkholderiales;f__Comamonadaceae;g__Delftia;g__Delftia	R-Cu_R-As	0.0849531	0.0162936	0.0424313	0.162776	0.153424	0.00973935	0.0142076
ASV520	p__Proteobacteria;c__Gammaproteobacteria;o__Burkholderiales;f__Rhodocyclaceae;g__Azoarcus;g__Azoarcus	R-Cu_R-As	0.0142851	0.00881586	0.0322266	0.00066192	0.00105399	0.0234441	0.0248453
ASV526	p__Proteobacteria;c__Gammaproteobacteria;o__Burkholderiales;f__Rhodocyclaceae;g__Thauera;g__Thauera	R-Cu_R-As	0.0111334	0.0162936	0.0424313	0.00191845	0.00236094	0.0199129	0.01274
ASV563	p__Proteobacteria;c__Gammaproteobacteria;o__Xanthomonadales;f__Rhodanobacteraceae;g__uncultured;g__uncultured	R-Cu_R-As	0.0334136	0.0162936	0.0424313	0.0079364	0.0132099	0.0600661	0.0297456
ASV610	p__Verrucomicrobiota;c__Verrucomicrobiae;o__Verrucomicrobiales;f__Verrucomicrobiaceae;g__Verrucomicrobium;g__Verrucomicrobium	R-Cu_R-As	0.0243667	0.00861071	0.0322266	0.000126729	0.000241007	0.0393508	0.0118004
ASV41	p__Bacteroidota;c__Bacteroidia;o__Bacteroidales;f__Bacteroidaceae;g__Bacteroides;s__uncultured_prokaryote	R-Zn_R-As	0.0224511	0.00902344	0.0322266	0.040762	0.0154066	0.00572815	0.00901974
ASV57	p__Bacteroidota;c__Bacteroidia;o__Bacteroidales;f__Dysgonomonadaceae;g__Proteiniphilum;s__uncultured_prokaryote	R-Zn_R-As	0.0100587	0.0162936	0.0424313	0.0189537	0.00724347	0.0037373	0.00601897
ASV115	p__Bacteroidota;c__Bacteroidia;o__Chitinophagales;f__Chitinophagaceae;g__Edaphobaculum;g__Edaphobaculum	R-Zn_R-As	0.0202098	0.00881586	0.0322266	0.000258281	0.000354894	0.0298558	0.0179509
ASV228	p__Firmicutes;c__Bacilli;o__Bacillales;f__Planococcaceae;g__Lysinibacillus;g__Lysinibacillus	R-Zn_R-As	0.0470256	0.00534568	0.0322266	0	0	0.070133	0.0848358
ASV235	p__Firmicutes;c__Bacilli;o__Erysipelotrichales;f__Erysipelatoclostridiaceae;g__UCG-004;s__uncultured_bacterium	R-Zn_R-As	0.0173748	0.00902344	0.0322266	0.0299295	0.013857	0.00253663	0.00234893
ASV424	p__Proteobacteria;c__Alphaproteobacteria;o__Caulobacterales;f__Caulobacteraceae;g__Brevundimonas;g__Brevundimonas	R-Zn_R-As	0.034197	0.00902344	0.0322266	0.0584734	0.0281905	0.00418982	0.00302224
ASV425	p__Proteobacteria;c__Alphaproteobacteria;o__Caulobacterales;f__Caulobacteraceae;g__Caulobacter;g__Caulobacter	R-Zn_R-As	0.0158851	0.00881586	0.0322266	0.025041	0.0256984	8.5096e-05	9.44108e-05
ASV511	p__Proteobacteria;c__Gammaproteobacteria;o__Burkholderiales;f__Comamonadaceae;g__Delftia;g__Delftia	R-Zn_R-As	0.115514	0.00902344	0.0322266	0.189796	0.102302	0.00973935	0.0142076
ASV520	p__Proteobacteria;c__Gammaproteobacteria;o__Burkholderiales;f__Rhodocyclaceae;g__Azoarcus;g__Azoarcus	R-Zn_R-As	0.0151677	0.00902344	0.0322266	0.000976413	0.00159888	0.0234441	0.0248453
ASV579	p__Spirochaetota;c__Spirochaetia;o__Spirochaetales;f__Spirochaetaceae;g__Sphaerochaeta;s__uncultured_bacterium	R-Zn_R-As	0.0106572	0.00902344	0.0322266	0.0185977	0.00760341	0.00188597	0.00346885
ASV610	p__Verrucomicrobiota;c__Verrucomicrobiae;o__Verrucomicrobiales;f__Verrucomicrobiaceae;g__Verrucomicrobium;g__Verrucomicrobium	R-Zn_R-As	0.0252157	0.00902344	0.0322266	0.00177622	0.00277854	0.0393508	0.0118004
ASV474	p__Proteobacteria;c__Alphaproteobacteria;o__Sphingomonadales;f__Sphingomonadaceae;f__Sphingomonadaceae;f__Sphingomonadaceae	R-Zn_R-Cu	0.021251	0.00881586	0.0322266	0.0244735	0.0221242	0.00010218	0.000151916
ASV525	p__Proteobacteria;c__Gammaproteobacteria;o__Burkholderiales;f__Rhodocyclaceae;g__Methyloversatilis;g__Methyloversatilis	R-Zn_R-Cu	0.0138578	0.00902344	0.0322266	0.0170399	0.0128364	0.00110994	0.00199238

## Sheet: Sheet1
Table S6. SIMPER results.
Taxonomy	Comparison	Left mean abundance	Left sd	Right mean abundance	Right sd	dif	PBRs
p__Firmicutes;c__Bacilli;o__Bacillales;f__Planococcaceae;g__Lysinibacillus;g__Lysinibacillus	R-control_R-As	0	0	0.070133	0.0848358	-0.070133	R4-As
p__Proteobacteria;c__Gammaproteobacteria;o__Burkholderiales;f__Comamonadaceae;f__Comamonadaceae;f__Comamonadaceae	R-control_R-As	0.00180988	0.000944654	0.0122648	0.0068295	-0.0104549	R4-As
p__Proteobacteria;c__Gammaproteobacteria;o__Burkholderiales;f__Rhodocyclaceae;g__Azovibrio;g__Azovibrio	R-control_R-As	0.0114739	0.0144876	0	0	0.0114739	R1-control
p__Proteobacteria;c__Gammaproteobacteria;o__Pseudomonadales;f__Moraxellaceae;g__Acinetobacter;g__Acinetobacter	R-control_R-As	0.0046992	0.0016465	0.0169471	0.0135709	-0.0122479	R4-As
p__Proteobacteria;c__Alphaproteobacteria;o__Caulobacterales;f__Caulobacteraceae;g__Brevundimonas;g__Brevundimonas	R-control_R-Cu	0.00140634	0.000387086	0.201573	0.133622	-0.200166	R3-Cu
p__Proteobacteria;c__Alphaproteobacteria;o__Reyranellales;f__Reyranellaceae;g__Reyranella;g__Reyranella	R-control_R-Cu	0.0267676	0.00915594	0.00229598	0.00310003	0.0244716	R1-control
p__Proteobacteria;c__Alphaproteobacteria;o__Sphingomonadales;f__Sphingomonadaceae;g__Sphingosinicella;g__Sphingosinicella	R-control_R-Cu	0.000141646	8.74517e-05	0.0187509	0.0165072	-0.0186093	R3-Cu
p__Proteobacteria;c__Alphaproteobacteria;o__Tistrellales;f__Tistrellaceae;g__Tistrella;s__Tistrella_mobilis	R-control_R-Cu	0.437832	0.0763775	0.0692428	0.0843885	0.36859	R1-control
p__Proteobacteria;c__Gammaproteobacteria;o__Burkholderiales;f__Comamonadaceae;g__Delftia;g__Delftia	R-control_R-Cu	0.00679264	0.00854894	0.162776	0.153424	-0.155983	R3-Cu
p__Proteobacteria;c__Gammaproteobacteria;o__Burkholderiales;f__Rhodocyclaceae;g__Thauera;g__Thauera	R-control_R-Cu	0.0253956	0.0206156	0.00191845	0.00236094	0.0234771	R1-control
p__Proteobacteria;c__Gammaproteobacteria;o__Xanthomonadales;f__Rhodanobacteraceae;g__uncultured;g__uncultured	R-control_R-Cu	0.0677211	0.0302382	0.0079364	0.0132099	0.0597848	R1-control
p__Verrucomicrobiota;c__Verrucomicrobiae;o__Verrucomicrobiales;f__Verrucomicrobiaceae;g__Verrucomicrobium;g__Verrucomicrobium	R-control_R-Cu	0.068441	0.0110361	0.000126729	0.000241007	0.0683142	R1-control
p__Bacteroidota;c__Bacteroidia;o__Bacteroidales;f__Bacteroidaceae;g__Bacteroides;s__uncultured_prokaryote	R-control_R-Zn	0.00405052	0.001551	0.040762	0.0154066	-0.0367115	R2-Zn
p__Bacteroidota;c__Bacteroidia;o__Bacteroidales;f__Dysgonomonadaceae;g__Proteiniphilum;s__uncultured_prokaryote	R-control_R-Zn	0.00209013	0.000604776	0.0189537	0.00724347	-0.0168636	R2-Zn
p__Firmicutes;c__Bacilli;o__Erysipelotrichales;f__Erysipelatoclostridiaceae;g__UCG-004;s__uncultured_bacterium	R-control_R-Zn	0.00348187	0.00114008	0.0299295	0.013857	-0.0264476	R2-Zn
p__Proteobacteria;c__Alphaproteobacteria;o__Caulobacterales;f__Caulobacteraceae;g__Brevundimonas;g__Brevundimonas	R-control_R-Zn	0.00140634	0.000387086	0.0584734	0.0281905	-0.0570671	R2-Zn
p__Proteobacteria;c__Alphaproteobacteria;o__Caulobacterales;f__Caulobacteraceae;g__Caulobacter;g__Caulobacter	R-control_R-Zn	5.42687e-05	7.65191e-05	0.025041	0.0256984	-0.0249867	R2-Zn
p__Proteobacteria;c__Alphaproteobacteria;o__Reyranellales;f__Reyranellaceae;g__Reyranella;g__Reyranella	R-control_R-Zn	0.0267676	0.00915594	0.00481315	0.00666341	0.0219544	R1-control
p__Proteobacteria;c__Alphaproteobacteria;o__Tistrellales;f__Tistrellaceae;g__Tistrella;s__Tistrella_mobilis	R-control_R-Zn	0.437832	0.0763775	0.0951782	0.112795	0.342654	R1-control
p__Proteobacteria;c__Gammaproteobacteria;o__Burkholderiales;f__Comamonadaceae;g__Delftia;g__Delftia	R-control_R-Zn	0.00679264	0.00854894	0.189796	0.102302	-0.183003	R2-Zn
p__Proteobacteria;c__Gammaproteobacteria;o__Pseudomonadales;f__Pseudomonadaceae;g__Pseudomonas;g__Pseudomonas	R-control_R-Zn	0.00363007	0.00313824	0.0171684	0.0133995	-0.0135384	R2-Zn
p__Spirochaetota;c__Spirochaetia;o__Spirochaetales;f__Spirochaetaceae;g__Sphaerochaeta;s__uncultured_bacterium	R-control_R-Zn	0.000657034	0.000408459	0.0185977	0.00760341	-0.0179406	R2-Zn
p__Verrucomicrobiota;c__Verrucomicrobiae;o__Verrucomicrobiales;f__Verrucomicrobiaceae;g__Verrucomicrobium;g__Verrucomicrobium	R-control_R-Zn	0.068441	0.0110361	0.00177622	0.00277854	0.0666647	R1-control
p__Acidobacteriota;c__Blastocatellia;o__Blastocatellales;f__Blastocatellaceae;f__Blastocatellaceae;f__Blastocatellaceae	R-Cu_R-As	0.00280505	0.00526212	0.0192336	0.00907249	-0.0164286	R4-As
p__Bacteroidota;c__Bacteroidia;o__Chitinophagales;f__Chitinophagaceae;g__Edaphobaculum;g__Edaphobaculum	R-Cu_R-As	0.000870095	0.00170164	0.0298558	0.0179509	-0.0289857	R4-As
p__Firmicutes;c__Bacilli;o__Bacillales;f__Planococcaceae;g__Lysinibacillus;g__Lysinibacillus	R-Cu_R-As	0.000905943	0.00199817	0.070133	0.0848358	-0.069227	R4-As
p__Planctomycetota;c__Phycisphaerae;o__Phycisphaerales;f__Phycisphaeraceae;g__SM1A02;g__SM1A02	R-Cu_R-As	0.001206	0.00264966	0.0251891	0.0163489	-0.0239831	R4-As
p__Proteobacteria;c__Alphaproteobacteria;o__Caulobacterales;f__Caulobacteraceae;g__Brevundimonas;g__Brevundimonas	R-Cu_R-As	0.201573	0.133622	0.00418982	0.00302224	0.197383	R3-Cu
p__Proteobacteria;c__Alphaproteobacteria;o__Sphingomonadales;f__Sphingomonadaceae;g__Sphingosinicella;g__Sphingosinicella	R-Cu_R-As	0.0187509	0.0165072	9.78137e-05	8.35978e-05	0.0186531	R3-Cu
p__Proteobacteria;c__Alphaproteobacteria;o__Tistrellales;f__Tistrellaceae;g__Tistrella;s__Tistrella_mobilis	R-Cu_R-As	0.0692428	0.0843885	0.283426	0.125055	-0.214183	R4-As
p__Proteobacteria;c__Gammaproteobacteria;o__Burkholderiales;f__Comamonadaceae;g__Delftia;g__Delftia	R-Cu_R-As	0.162776	0.153424	0.00973935	0.0142076	0.153036	R3-Cu
p__Proteobacteria;c__Gammaproteobacteria;o__Burkholderiales;f__Rhodocyclaceae;g__Azoarcus;g__Azoarcus	R-Cu_R-As	0.00066192	0.00105399	0.0234441	0.0248453	-0.0227822	R4-As
p__Proteobacteria;c__Gammaproteobacteria;o__Burkholderiales;f__Rhodocyclaceae;g__Thauera;g__Thauera	R-Cu_R-As	0.00191845	0.00236094	0.0199129	0.01274	-0.0179944	R4-As
p__Proteobacteria;c__Gammaproteobacteria;o__Xanthomonadales;f__Rhodanobacteraceae;g__uncultured;g__uncultured	R-Cu_R-As	0.0079364	0.0132099	0.0600661	0.0297456	-0.0521297	R4-As
p__Verrucomicrobiota;c__Verrucomicrobiae;o__Verrucomicrobiales;f__Verrucomicrobiaceae;g__Verrucomicrobium;g__Verrucomicrobium	R-Cu_R-As	0.000126729	0.000241007	0.0393508	0.0118004	-0.039224	R4-As
p__Bacteroidota;c__Bacteroidia;o__Bacteroidales;f__Bacteroidaceae;g__Bacteroides;s__uncultured_prokaryote	R-Zn_R-As	0.040762	0.0154066	0.00572815	0.00901974	0.0350338	R2-Zn
p__Bacteroidota;c__Bacteroidia;o__Bacteroidales;f__Dysgonomonadaceae;g__Proteiniphilum;s__uncultured_prokaryote	R-Zn_R-As	0.0189537	0.00724347	0.0037373	0.00601897	0.0152164	R2-Zn
p__Bacteroidota;c__Bacteroidia;o__Chitinophagales;f__Chitinophagaceae;g__Edaphobaculum;g__Edaphobaculum	R-Zn_R-As	0.000258281	0.000354894	0.0298558	0.0179509	-0.0295975	R4-As
p__Firmicutes;c__Bacilli;o__Bacillales;f__Planococcaceae;g__Lysinibacillus;g__Lysinibacillus	R-Zn_R-As	0	0	0.070133	0.0848358	-0.070133	R4-As
p__Firmicutes;c__Bacilli;o__Erysipelotrichales;f__Erysipelatoclostridiaceae;g__UCG-004;s__uncultured_bacterium	R-Zn_R-As	0.0299295	0.013857	0.00253663	0.00234893	0.0273928	R2-Zn
p__Proteobacteria;c__Alphaproteobacteria;o__Caulobacterales;f__Caulobacteraceae;g__Brevundimonas;g__Brevundimonas	R-Zn_R-As	0.0584734	0.0281905	0.00418982	0.00302224	0.0542836	R2-Zn
p__Proteobacteria;c__Alphaproteobacteria;o__Caulobacterales;f__Caulobacteraceae;g__Caulobacter;g__Caulobacter	R-Zn_R-As	0.025041	0.0256984	8.5096e-05	9.44108e-05	0.0249559	R2-Zn
p__Proteobacteria;c__Gammaproteobacteria;o__Burkholderiales;f__Comamonadaceae;g__Delftia;g__Delftia	R-Zn_R-As	0.189796	0.102302	0.00973935	0.0142076	0.180056	R2-Zn
p__Proteobacteria;c__Gammaproteobacteria;o__Burkholderiales;f__Rhodocyclaceae;g__Azoarcus;g__Azoarcus	R-Zn_R-As	0.000976413	0.00159888	0.0234441	0.0248453	-0.0224677	R4-As
p__Spirochaetota;c__Spirochaetia;o__Spirochaetales;f__Spirochaetaceae;g__Sphaerochaeta;s__uncultured_bacterium	R-Zn_R-As	0.0185977	0.00760341	0.00188597	0.00346885	0.0167117	R2-Zn
p__Verrucomicrobiota;c__Verrucomicrobiae;o__Verrucomicrobiales;f__Verrucomicrobiaceae;g__Verrucomicrobium;g__Verrucomicrobium	R-Zn_R-As	0.00177622	0.00277854	0.0393508	0.0118004	-0.0375745	R4-As
p__Proteobacteria;c__Alphaproteobacteria;o__Sphingomonadales;f__Sphingomonadaceae;f__Sphingomonadaceae;f__Sphingomonadaceae	R-Zn_R-Cu	0.0244735	0.0221242	0.00010218	0.000151916	0.0243714	R2-Zn
p__Proteobacteria;c__Gammaproteobacteria;o__Burkholderiales;f__Rhodocyclaceae;g__Methyloversatilis;g__Methyloversatilis	R-Zn_R-Cu	0.0170399	0.0128364	0.00110994	0.00199238	0.0159299	R2-Zn
