# Supplementary material for: Current Concentrations of Zn, Cu, and As in Piggery Wastewater Compromise Nutrient Removals in Microalgae–Bacteria Photobioreactors Due to Altered Microbial Communities
Source: Biology (Basel). 2022 Aug 5;11(8):1176. doi: 10.3390/biology11081176 (PMC9405037; doi:10.3390/biology11081176)
Supplement: Supplementary file 1 [file biology-11-01176-s001.zip › Table S7_correlations.xlsx]

## Sheet: correlations_sign_genus.csv
Table S7. Spearman’s rank correlations between selected operational variables and bacterial genera. Only significant correlations (adjusted p-values < 0.05) are indicated. The genera that do not have a significant correlation, according to the established parameters, were eliminated from the table.Correlations over |0.70| are marked with colored cells: blue for negative and red for positive value…
			Taxonomy						Effluent concentrations
Kingdom	Phylum	Class	Order	Family	Genus	Fv/Fm	TOC	TN	ammonia	Cu liquid phase	Zn liquid phase	As liquid phase
d__Bacteria	p__Firmicutes	c__Clostridia	o__Clostridia	f__Hungateiclostridiaceae	g__HN-HF0106	-0.896675	0.900603			0.608352	0.711374
d__Bacteria	p__Firmicutes	c__Bacilli	o__Acholeplasmatales	f__Acholeplasmataceae	g__Acholeplasma	-0.894901	0.826627			0.680948	0.698118
d__Bacteria	p__Firmicutes	c__Bacilli	o__Izemoplasmatales	f__Izemoplasmatales	g__Izemoplasmatales	-0.894139	0.840918			0.737762	0.643023
d__Bacteria	p__Bacteroidota	c__Bacteroidia	o__Bacteroidales	f__Dysgonomonadaceae	g__uncultured	-0.8899	0.863055			0.692736	0.611178
d__Bacteria	p__Cloacimonadota	c__Cloacimonadia	o__Cloacimonadales	f__LK-44f	g__LK-44f	-0.889091	0.831012			0.616363	0.66881
d__Bacteria	p__Spirochaetota	c__Spirochaetia	o__Spirochaetales	f__Spirochaetaceae	g__Sphaerochaeta	-0.872796	0.864987			0.651306	0.681514
d__Bacteria	p__Firmicutes	c__Clostridia	o__Clostridia_vadinBB60_group	f__Clostridia_vadinBB60_group	g__Clostridia_vadinBB60_group	-0.871214	0.762166			0.603852	0.654367
d__Bacteria	p__Bacteroidota	c__Bacteroidia	o__Bacteroidales	f__Bacteroidales_UCG-001	g__Bacteroidales_UCG-001	-0.869746	0.867996			0.582964	0.658873
d__Bacteria	p__Bacteroidota	c__Bacteroidia	o__Bacteroidales	f__Paludibacteraceae	g__uncultured	-0.865608	0.835944			0.716824	0.590118
d__Bacteria	p__Firmicutes	c__Limnochordia	o__M55-D21	f__M55-D21	g__M55-D21	-0.865585	0.832006			0.580776	0.769825
d__Bacteria	p__Bacteroidota	c__Bacteroidia	o__Bacteroidales	f__Marinilabiliaceae	g__uncultured	-0.865443	0.848702			0.63614	0.606498
d__Bacteria	p__Firmicutes	c__Clostridia	o__Clostridia	f__Hungateiclostridiaceae	g__uncultured	-0.861064	0.859117			0.629577	0.615856
d__Bacteria	p__Bacteroidota	c__Bacteroidia	o__Bacteroidales	f__Rikenellaceae	g__Rikenellaceae_RC9_gut_group	-0.860599	0.799549				0.613589
d__Bacteria	p__Bacteroidota	c__Bacteroidia	o__Bacteroidales	f__Rikenellaceae	g__DMER64	-0.859075	0.797292			0.643072
d__Bacteria	p__Firmicutes	c__Clostridia	o__Oscillospirales	f__UCG-010	g__UCG-010	-0.857757	0.864501			0.712033	0.753436
d__Bacteria	p__Firmicutes	c__Clostridia	o__Oscillospirales	f__Ruminococcaceae	f__Ruminococcaceae	-0.855183	0.858313			0.665989	0.665279
d__Bacteria	p__Firmicutes	c__Bacilli	o__Lactobacillales	f__Carnobacteriaceae	g__Atopostipes	-0.85442	0.892494			0.670572	0.771611
d__Bacteria	p__Proteobacteria	c__Gammaproteobacteria	o__Cardiobacteriales	f__Wohlfahrtiimonadaceae	g__Ignatzschineria	-0.85147	0.802316				0.61269
d__Bacteria	p__Bacteroidota	c__Bacteroidia	o__Bacteroidales	f__Bacteroidaceae	g__Bacteroides	-0.843067	0.844679				0.620382
d__Bacteria	p__Bacteroidota	c__Bacteroidia	o__Bacteroidales	f__Dysgonomonadaceae	g__Proteiniphilum	-0.83798	0.814452			0.571867	0.573265
d__Bacteria	p__Firmicutes	c__Clostridia	o__Lachnospirales	f__Lachnospiraceae	g__Herbinix	-0.836451	0.877601			0.588569	0.71205
d__Bacteria	p__Firmicutes	c__Bacilli	o__Erysipelotrichales	f__Erysipelatoclostridiaceae	g__UCG-004	-0.836207	0.829635			0.61837	0.571325
d__Bacteria	p__Firmicutes	c__Clostridia	o__Clostridia	f__Hungateiclostridiaceae	g__Fastidiosipila	-0.833471	0.872084			0.581536
d__Bacteria	p__Verrucomicrobiota	c__Lentisphaeria	o__Oligosphaerales	f__Oligosphaeraceae	g__Z20	-0.831314	0.790092			0.547957	0.704694
d__Bacteria	p__Firmicutes	c__Limnochordia	o__uncultured	f__uncultured	g__uncultured	-0.828289	0.822996				0.615449
d__Bacteria	p__Firmicutes	c__Clostridia	o__Peptostreptococcales-Tissierellales	f__Peptostreptococcales-Tissierellales	f__Peptostreptococcales-Tissierellales	-0.826878	0.797373			0.583858	0.582123
d__Bacteria	p__Verrucomicrobiota	c__Kiritimatiellae	o__WCHB1-41	f__WCHB1-41	g__WCHB1-41	-0.82605	0.843094				0.700563
d__Bacteria	p__Fibrobacterota	c__Fibrobacteria	o__Fibrobacterales	f__Fibrobacteraceae	g__Fibrobacter	-0.825735	0.793666				0.669569
d__Bacteria	p__Bacteroidota	c__Bacteroidia	o__Bacteroidales	f__Bacteroidales_RF16_group	g__Bacteroidales_RF16_group	-0.817464	0.768256				0.702975
d__Bacteria	p__Firmicutes	c__Clostridia	o__Oscillospirales	f__Oscillospiraceae	g__UCG-005	-0.816872	0.788754				0.745175
d__Bacteria	p__Firmicutes	c__Clostridia	o__Clostridia	f__Hungateiclostridiaceae	f__Hungateiclostridiaceae	-0.813995	0.824511			0.606425	0.779316
d__Bacteria	p__Firmicutes	c__Negativicutes	o__Acidaminococcales	f__Acidaminococcaceae	g__Phascolarctobacterium	-0.809131	0.826392				0.545262
sphaerochaeta	p__Bacteroidota	c__Bacteroidia	o__Bacteroidales	f__Dysgonomonadaceae	f__Dysgonomonadaceae	-0.806162	0.819246				0.556258
d__Bacteria	p__Bacteroidota	c__Bacteroidia	o__Bacteroidales	f__Tannerellaceae	f__Tannerellaceae	-0.800649	0.876139				0.571429
d__Bacteria	p__Proteobacteria	c__Gammaproteobacteria	o__Oceanospirillales	f__Saccharospirillaceae	g__Oceanobacter	-0.799103	0.821641				0.70742
d__Bacteria	p__Firmicutes	c__Clostridia	o__Peptostreptococcales-Tissierellales	f__Peptostreptococcales-Tissierellales	g__Anaerococcus	-0.786798	0.774852				0.640934
d__Bacteria	p__Firmicutes	c__Clostridia	o__Lachnospirales	f__Lachnospiraceae	f__Lachnospiraceae	-0.781738	0.861017			0.628373	0.596373
d__Bacteria	p__Firmicutes	c__Bacilli	o__Lactobacillales	f__Aerococcaceae	g__Ignavigranum	-0.776269	0.811716				0.701195
d__Bacteria	p__Firmicutes	c__Clostridia	o__Oscillospirales	f__Oscillospiraceae	g__NK4A214_group	-0.771562	0.905596				0.578249
d__Bacteria	p__Bacteroidota	c__Bacteroidia	o__Bacteroidales	f__Dysgonomonadaceae	g__Fermentimonas	-0.767129	0.778781			0.541998	0.54436
d__Bacteria	p__Firmicutes	c__Clostridia	o__Lachnospirales	f__Lachnospiraceae	g__Lachnospiraceae_XPB1014_group	-0.765107	0.824511				0.665565
d__Bacteria	p__Firmicutes	c__Clostridia	o__Clostridia_UCG-014	f__Clostridia_UCG-014	g__Clostridia_UCG-014	-0.763316	0.765989			0.592244	0.57607
d__Bacteria	p__Bacteroidota	c__Bacteroidia	o__Bacteroidales	f__FTLpost3	g__FTLpost3	-0.761254	0.706886
d__Bacteria	p__Bacteroidota	c__Bacteroidia	o__Bacteroidales	f__p-251-o5	g__p-251-o5	-0.759152	0.661533
d__Bacteria	p__Firmicutes	c__Clostridia	o__Peptostreptococcales-Tissierellales	f__Peptostreptococcales-Tissierellales	g__Anaerosalibacter	-0.757284	0.745235				0.698135
d__Bacteria	p__Firmicutes	c__Clostridia	o__Peptostreptococcales-Tissierellales	f__Peptostreptococcales-Tissierellales	g__Tepidimicrobium	-0.74768	0.785894				0.760215
d__Bacteria	p__Bacteroidota	c__Bacteroidia	o__Bacteroidales	f__Marinifilaceae	g__Sanguibacteroides	-0.745867	0.752866			0.545537	0.681869
d__Bacteria	p__Proteobacteria	c__Gammaproteobacteria	o__Burkholderiales	f__Rhodocyclaceae	g__Azospira	-0.735936	0.841447				0.738566
d__Bacteria	p__Proteobacteria	c__Gammaproteobacteria	o__Burkholderiales	f__Comamonadaceae	g__Delftia	-0.735588	0.74088			0.679301	0.689062
d__Bacteria	p__Firmicutes	c__Bacilli	o__Lactobacillales	f__Carnobacteriaceae	g__Jeotgalibaca	-0.73016	0.783651			0.598668	0.637387
d__Bacteria	p__Bacteroidota	c__Bacteroidia	o__Bacteroidales	f__Rikenellaceae	g__dgA-11_gut_group	-0.729252	0.865714		-0.591381	0.594042	0.684783
d__Bacteria	p__Firmicutes	c__Clostridia	o__Oscillospirales	f__Oscillospiraceae	g__UCG-002	-0.728215	0.751608				0.591458
d__Bacteria	p__Cloacimonadota	c__Cloacimonadia	o__Cloacimonadales	f__GZKB75	g__GZKB75	-0.727168	0.753714				0.765135
d__Bacteria	p__Bacteroidota	c__Bacteroidia	o__Bacteroidales	f__Rikenellaceae	g__Anaerocella	-0.725678	0.719067				0.646797
d__Bacteria	p__Firmicutes	c__Clostridia	o__Oscillospirales	f__[Eubacterium]_coprostanoligenes_group	g__[Eubacterium]_coprostanoligenes_group	-0.724691	0.764797			0.746527	0.585782
d__Bacteria	p__Firmicutes	c__Bacilli	o__Acholeplasmatales	f__Acholeplasmataceae	g__Anaeroplasma	-0.724463	0.685152			0.649423
d__Bacteria	p__Firmicutes	c__Clostridia	o__Oscillospirales	f__Ruminococcaceae	g__uncultured	-0.722696	0.773131				0.68012
d__Bacteria	p__Fusobacteriota	c__Fusobacteriia	o__Fusobacteriales	f__Leptotrichiaceae	g__uncultured	-0.720013	0.819025			0.577759	0.611046
d__Bacteria	p__Proteobacteria	c__Alphaproteobacteria	o__Caulobacterales	f__Caulobacteraceae	g__Brevundimonas	-0.71958	0.726589			0.883503	0.652835
d__Bacteria	p__Bacteroidota	c__Bacteroidia	o__Bacteroidales	f__Marinifilaceae	g__uncultured	-0.719265	0.674923				0.561795
d__Bacteria	p__Spirochaetota	c__Spirochaetia	o__Spirochaetales	f__Spirochaetaceae	g__Treponema	-0.706887	0.780286				0.605893
d__Bacteria	p__Firmicutes	c__Bacilli	o__RF39	f__RF39	g__RF39	-0.705662	0.847024
d__Bacteria	p__Proteobacteria	c__Alphaproteobacteria	o__Caulobacterales	f__Caulobacteraceae	g__Caulobacter	-0.697284	0.703963			0.64987	0.896166
d__Bacteria	p__Bacteroidota	c__Bacteroidia	o__Bacteroidales	f__Dysgonomonadaceae	g__Dysgonomonadaceae	-0.692025	0.751819
d__Bacteria	p__Desulfobacterota	c__Desulfovibrionia	o__Desulfovibrionales	f__Desulfovibrionaceae	g__Desulfovibrio	-0.683926	0.685917
d__Bacteria	p__Proteobacteria	c__Gammaproteobacteria	o__Aeromonadales	f__Succinivibrionaceae	g__Succinivibrio	-0.682447	0.718412				0.591563
d__Bacteria	p__Firmicutes	c__Clostridia	o__Christensenellales	f__Christensenellaceae	g__Christensenellaceae_R-7_group	-0.681987	0.782216
d__Bacteria	p__Cloacimonadota	c__Cloacimonadia	o__Cloacimonadales	f__Cloacimonadaceae	g__Candidatus_Cloacimonas	-0.68159	0.746277
d__Bacteria	p__Bacteroidota	c__Bacteroidia	o__Bacteroidales	f__Tannerellaceae	g__uncultured	-0.669415	0.700794		-0.586998
d__Bacteria	p__Firmicutes	c__Limnochordia	o__Limnochordia	f__Limnochordia	g__Hydrogenispora	-0.667213	0.671103				0.72322
d__Bacteria	p__Bacteroidota	c__Bacteroidia	o__Flavobacteriales	f__Flavobacteriaceae	g__Myroides	-0.662051	0.650303			0.625459
d__Bacteria	p__Firmicutes	c__Bacilli	o__Mycoplasmatales	f__Mycoplasmataceae	g__Mycoplasma	-0.655954	0.631364				0.596299
d__Bacteria	p__Firmicutes	c__Clostridia	o__Peptostreptococcales-Tissierellales	f__Peptostreptococcales-Tissierellales	g__Peptoniphilus	-0.653995	0.761772				0.638677
d__Bacteria	p__Firmicutes	c__Clostridia	o__Peptostreptococcales-Tissierellales	f__Peptostreptococcales-Tissierellales	g__Helcococcus	-0.648052	0.656756				0.580703
d__Bacteria	p__Firmicutes	c__Bacilli	o__Lactobacillales	f__Aerococcaceae	g__Facklamia	-0.645588	0.74584				0.543914
d__Bacteria	p__Bacteroidota	c__Bacteroidia	o__Cytophagales	f__Spirosomaceae	g__Emticicia	-0.641387	0.62284			0.565255	0.821318
d__Bacteria	p__Firmicutes	c__Bacilli	o__Lactobacillales	f__Lactobacillaceae	g__Lactobacillus	-0.636283	0.563987
d__Bacteria	p__Proteobacteria	c__Alphaproteobacteria	o__Rhizobiales	f__Xanthobacteraceae	f__Xanthobacteraceae	-0.633693	0.566185			0.639387	0.577477
d__Bacteria	p__Bacteroidota	c__Bacteroidia	o__Bacteroidales	f__p-2534-18B5_gut_group	g__p-2534-18B5_gut_group	-0.631554	0.606366			0.65188
d__Bacteria	p__Firmicutes	c__Clostridia	o__Clostridiales	f__Clostridiaceae	g__Clostridiaceae	-0.631554	0.740894				0.562773
d__Bacteria	p__Firmicutes	c__Bacilli	o__Lactobacillales	f__Enterococcaceae	g__Enterococcus	-0.626098	0.76254
d__Bacteria	p__Bacteroidota	c__Bacteroidia	o__Bacteroidales	f__Tannerellaceae	g__Parabacteroides	-0.619647					0.608264
d__Bacteria	p__Bacteroidota	c__Bacteroidia	o__Bacteroidales	f__Rikenellaceae	g__uncultured	-0.61805	0.710685
d__Bacteria	p__Firmicutes	c__Clostridia	o__Christensenellales	f__Christensenellaceae	f__Christensenellaceae	-0.615912	0.597541			0.671906	0.570713
d__Bacteria	p__Bacteroidota	c__Bacteroidia	o__Bacteroidales	f__Marinilabiliaceae	g__Marinilabiliaceae	-0.61061	0.584226
d__Bacteria	p__Bacteroidota	c__Bacteroidia	o__Chitinophagales	f__Chitinophagaceae	g__Pseudoflavitalea	-0.61061			-0.58501		0.585134
d__Bacteria	p__Firmicutes	c__Clostridia	o__Peptostreptococcales-Tissierellales	f__Peptostreptococcales-Tissierellales	g__W5053	-0.593075	0.58309
d__Bacteria	p__Firmicutes	c__Clostridia	o__Clostridia	f__Gracilibacteraceae	g__Lutispora	-0.559013	0.6208				0.672508
d__Bacteria	p__Bacteroidota	c__Bacteroidia	o__Cytophagales	f__Cyclobacteriaceae	f__Cyclobacteriaceae	-0.557217	0.583678			0.557439	0.618118
d__Bacteria	p__Firmicutes	c__Clostridia	o__Lachnospirales	f__Lachnospiraceae	g__Lachnospiraceae_AC2044_group	-0.555867	0.655825				0.667982
d__Bacteria	p__Bacteroidota	c__Bacteroidia	o__Bacteroidales	f__Prevotellaceae	g__Prevotellaceae_UCG-004	-0.545733	0.6122				0.695252
d__Bacteria	p__Proteobacteria	c__Alphaproteobacteria	o__Sphingomonadales	f__Sphingomonadaceae	g__Sphingosinicella	-0.543552				0.727329	0.542707
d__Bacteria	p__Proteobacteria	c__Gammaproteobacteria	o__Xanthomonadales	f__Rhodanobacteraceae	g__Pseudofulvimonas	0.548386				-0.567927
d__Bacteria	p__Chloroflexi	c__Anaerolineae	o__Anaerolineales	f__Anaerolineaceae	g__Anaerolinea	0.548881
d__Bacteria	p__Bacteroidota	c__Bacteroidia	o__Flavobacteriales	f__Weeksellaceae	g__Chryseobacterium	0.555729	-0.563417				-0.595924
d__Bacteria	p__Proteobacteria	c__Gammaproteobacteria	o__Burkholderiales	o__Burkholderiales	o__Burkholderiales	0.556731	-0.561724
d__Bacteria	p__Proteobacteria	c__Gammaproteobacteria	o__Burkholderiales	f__Hydrogenophilaceae	g__Thiobacillus	0.562428	-0.63736		0.840269	-0.581225
d__Bacteria	p__Patescibacteria	c__Microgenomatia	o__Candidatus_Pacebacteria	f__Candidatus_Pacebacteria	g__Candidatus_Pacebacteria	0.565531					-0.619591
d__Bacteria	p__Spirochaetota	c__Leptospirae	o__Leptospirales	f__Leptospiraceae	g__Leptonema	0.565721	-0.731561
d__Bacteria	p__Chloroflexi	c__Anaerolineae	o__Anaerolineales	f__Anaerolineaceae	f__Anaerolineaceae	0.578621				-0.58526
d__Bacteria	p__Bacteroidota	c__Bacteroidia	o__Bacteroidales	f__Bacteroidetes_vadinHA17	g__Bacteroidetes_vadinHA17	0.58116				-0.589958
d__Bacteria	p__Firmicutes	c__Clostridia	o__Peptostreptococcales-Tissierellales	f__Peptostreptococcaceae	g__Proteocatella	0.583658						0.622132
d__Bacteria	p__Bacteroidota	c__Bacteroidia	o__Bacteroidales	f__Prolixibacteraceae	g__WCHB1-32	0.586915	-0.561842				-0.624689
d__Bacteria	p__Bacteroidota	c__Kryptonia	o__Kryptoniales	f__MSB-3C8	g__MSB-3C8	0.590348	-0.59975
d__Bacteria	p__Bacteroidota	c__Bacteroidia	o__Chitinophagales	f__Chitinophagaceae	g__Dinghuibacter	0.591409	-0.723778			-0.584079
d__Bacteria	p__Bacteroidota	c__Bacteroidia	o__Bacteroidales	f__Tannerellaceae	g__Macellibacteroides	0.595383	-0.727858			-0.618094	-0.542015
d__Bacteria	p__Chloroflexi	c__OLB14	o__OLB14	f__OLB14	g__OLB14	0.598986	-0.651821			-0.548494
d__Bacteria	p__Proteobacteria	c__Gammaproteobacteria	o__Burkholderiales	f__Rhodocyclaceae	g__Thauera	0.602953			0.587262	-0.606842	-0.560759
d__Bacteria	p__Proteobacteria	c__Alphaproteobacteria	o__Rhizobiales	f__Rhizobiales_Incertae_Sedis	g__Nordella	0.604988	-0.624171				-0.550862
d__Bacteria	p__Desulfobacterota	c__Desulfovibrionia	o__Desulfovibrionales	f__Desulfomicrobiaceae	g__Desulfomicrobium	0.608442	-0.630509	-0.554299		-0.695993	-0.579744
d__Bacteria	p__Proteobacteria	c__Alphaproteobacteria	o__Dongiales	f__Dongiaceae	g__Dongia	0.613263	-0.615901
d__Bacteria	p__Proteobacteria	c__Gammaproteobacteria	o__CCD24	f__CCD24	g__CCD24	0.615517	-0.604668
d__Bacteria	p__Proteobacteria	c__Alphaproteobacteria	o__Rhizobiales	f__Hyphomicrobiaceae	g__Pedomicrobium	0.617118
d__Bacteria	p__Proteobacteria	c__Alphaproteobacteria	o__Azospirillales	f__Azospirillaceae	g__Azospirillum	0.618367	-0.558946		0.685542	-0.568999
d__Bacteria	p__Proteobacteria	c__Alphaproteobacteria	o__Rhodospirillales	f__uncultured	g__uncultured	0.619108	-0.698572
d__Bacteria	p__Proteobacteria	c__Alphaproteobacteria	o__Reyranellales	f__Reyranellaceae	g__uncultured	0.619122	-0.692963
d__Bacteria	p__Patescibacteria	c__Saccharimonadia	o__Saccharimonadales	f__Saccharimonadales	g__Saccharimonadales	0.622895						0.585821
d__Bacteria	p__Proteobacteria	c__Alphaproteobacteria	o__Azospirillales	f__Inquilinaceae	g__Inquilinus	0.626207
d__Bacteria	p__Verrucomicrobiota	c__Verrucomicrobiae	o__Chthoniobacterales	f__Terrimicrobiaceae	g__Terrimicrobium	0.628138	-0.629697
d__Bacteria	p__Armatimonadota	c__Fimbriimonadia	o__Fimbriimonadales	f__Fimbriimonadaceae	g__Fimbriimonadaceae	0.629812	-0.561773			-0.59347	-0.594011
d__Bacteria	p__Verrucomicrobiota	c__Verrucomicrobiae	o__Verrucomicrobiales	f__DEV007	g__DEV007	0.634089	-0.702514			-0.557616	-0.547739
d__Bacteria	p__Planctomycetota	c__Planctomycetes	o__Gemmatales	f__Gemmataceae	g__Gemmata	0.641162	-0.678135
d__Bacteria	p__Bacteroidota	c__Bacteroidia	o__Flavobacteriales	f__NS9_marine_group	g__NS9_marine_group	0.644652	-0.601609			-0.64821	-0.645498
d__Bacteria	p__Proteobacteria	c__Gammaproteobacteria	o__211ds20	f__211ds20	g__211ds20	0.649392	-0.700596			-0.548181	-0.571783
d__Bacteria	p__Bacteroidota	c__Bacteroidia	o__Bacteroidales	f__Prolixibacteraceae	g__uncultured	0.65439	-0.694978		0.710985	-0.546744	-0.699625
d__Bacteria	p__Proteobacteria	c__Alphaproteobacteria	o__Rhodobacterales	f__Rhodobacteraceae	f__Rhodobacteraceae	0.662645	-0.693032			-0.698467
d__Bacteria	p__Bdellovibrionota	c__Bdellovibrionia	o__Bacteriovoracales	f__Bacteriovoracaceae	g__Peredibacter	0.669805	-0.653543			-0.655037	-0.619509
d__Bacteria	p__Proteobacteria	c__Gammaproteobacteria	o__Legionellales	f__Legionellaceae	g__Legionella	0.671414	-0.607305
d__Bacteria	p__Firmicutes	c__Bacilli	o__Erysipelotrichales	f__Erysipelotrichaceae	f__Erysipelotrichaceae	0.67322					-0.571334	0.737725
d__Bacteria	p__Proteobacteria	c__Gammaproteobacteria	o__Burkholderiales	f__Burkholderiaceae	g__Limnobacter	0.676563	-0.694502
d__Bacteria	p__Proteobacteria	c__Alphaproteobacteria	o__Rhizobiales	f__Xanthobacteraceae	g__Pseudoxanthobacter	0.685547	-0.638042		0.594187	-0.691045
d__Bacteria	p__Proteobacteria	c__Alphaproteobacteria	o__Reyranellales	f__Reyranellaceae	g__Reyranella	0.690614	-0.703272		0.585	-0.702356
d__Bacteria	p__Proteobacteria	c__Gammaproteobacteria	o__Burkholderiales	f__Alcaligenaceae	g__Parapusillimonas	0.696556	-0.728839		0.611824	-0.711175	-0.632962
d__Bacteria	p__Proteobacteria	c__Alphaproteobacteria	c__Alphaproteobacteria	c__Alphaproteobacteria	c__Alphaproteobacteria	0.701964	-0.81879			-0.66946	-0.54928
d__Bacteria	p__Verrucomicrobiota	c__Verrucomicrobiae	o__Pedosphaerales	f__Pedosphaeraceae	g__ADurb.Bin063-1	0.704133	-0.608283		0.593617
d__Bacteria	p__Proteobacteria	c__Alphaproteobacteria	o__Caulobacterales	f__Caulobacteraceae	g__uncultured	0.708205	-0.803887
d__Bacteria	p__Proteobacteria	c__Alphaproteobacteria	o__Sphingomonadales	f__Sphingomonadaceae	g__Novosphingobium	0.708908	-0.666416			-0.591198
d__Bacteria	p__Bacteroidota	c__Bacteroidia	o__Flavobacteriales	f__Crocinitomicaceae	g__Fluviicola	0.709285	-0.680112					0.626967
d__Bacteria	p__Verrucomicrobiota	c__Verrucomicrobiae	o__Pedosphaerales	f__Pedosphaeraceae	g__Oikopleura	0.72331	-0.679124					0.624989
d__Bacteria	p__Chloroflexi	c__Anaerolineae	o__Caldilineales	f__Caldilineaceae	g__Litorilinea	0.725089	-0.843917			-0.621902	-0.569208
d__Bacteria	p__Myxococcota	c__Polyangia	o__Polyangiales	f__Sandaracinaceae	g__Sandaracinus	0.725379	-0.761658
d__Bacteria	p__Proteobacteria	c__Alphaproteobacteria	o__Rhodospirillales	f__Rhodospirillaceae	g__uncultured	0.725379	-0.589556
d__Bacteria	p__Proteobacteria	c__Gammaproteobacteria	o__Oceanospirillales	f__Pseudohongiellaceae	g__Pseudohongiella	0.738439	-0.864501
d__Bacteria	p__Gemmatimonadota	c__Gemmatimonadetes	o__Gemmatimonadales	f__Gemmatimonadaceae	g__uncultured	0.738818	-0.622687					0.683779
d__Bacteria	p__Bdellovibrionota	c__Oligoflexia	o__Oligoflexales	f__Oligoflexales	g__Oligoflexus	0.74619	-0.775246			-0.548181
d__Bacteria	p__Chloroflexi	c__Chloroflexia	o__Chloroflexales	f__Chloroflexaceae	g__Chloronema	0.747244	-0.71076			-0.564268	-0.579029
d__Bacteria	p__Hydrogenedentes	c__Hydrogenedentia	o__Hydrogenedentiales	f__Hydrogenedensaceae	g__Hydrogenedensaceae	0.753678	-0.759142			-0.744796
d__Bacteria	p__Myxococcota	c__Polyangia	o__Polyangiales	f__Phaselicystidaceae	g__Phaselicystis	0.758072	-0.592844		0.600227	-0.71496	-0.551022
d__Bacteria	p__Desulfobacterota	c__Desulfuromonadia	o__PB19	f__PB19	g__PB19	0.765607	-0.719183			-0.757942	-0.59582
d__Bacteria	p__Proteobacteria	c__Alphaproteobacteria	o__Rhizobiales	f__Devosiaceae	g__Devosia	0.769017	-0.767664			-0.671619
d__Bacteria	p__Firmicutes	c__Bacilli	o__Paenibacillales	f__Paenibacillaceae	g__Paenibacillus	0.770146	-0.813454		0.544631	-0.730059	-0.642734
d__Bacteria	p__Myxococcota	c__Polyangia	o__Polyangiales	f__Sandaracinaceae	g__uncultured	0.771004	-0.901439		0.552993	-0.692468	-0.577793
d__Bacteria	p__Proteobacteria	c__Alphaproteobacteria	o__Tistrellales	f__Tistrellaceae	g__Tistrella	0.772176	-0.648364			-0.698239	-0.696609
d__Bacteria	p__Bacteroidota	c__Bacteroidia	o__Chitinophagales	f__37-13	g__37-13	0.773678	-0.745771			-0.608676	-0.567652
d__Bacteria	p__Proteobacteria	c__Gammaproteobacteria	o__Xanthomonadales	f__Rhodanobacteraceae	g__uncultured	0.775225	-0.75141			-0.759171
d__Bacteria	p__Actinobacteriota	c__Acidimicrobiia	o__Microtrichales	f__uncultured	g__uncultured	0.777157	-0.665914			-0.635795
d__Bacteria	p__Verrucomicrobiota	c__Verrucomicrobiae	o__Verrucomicrobiales	f__Verrucomicrobiaceae	g__Verrucomicrobium	0.777716	-0.738427			-0.860272	-0.61103
d__Bacteria	p__Proteobacteria	c__Alphaproteobacteria	o__Kiloniellales	f__Fodinicurvataceae	g__uncultured	0.779111	-0.680606			-0.66692
d__Bacteria	p__Proteobacteria	c__Gammaproteobacteria	o__Burkholderiales	f__Burkholderiaceae	g__Lautropia	0.786156	-0.737197			-0.588133
d__Bacteria	p__Gemmatimonadota	c__Gemmatimonadetes	o__Gemmatimonadales	f__Gemmatimonadaceae	g__Gemmatimonas	0.787254	-0.861789
d__Bacteria	p__Proteobacteria	c__Alphaproteobacteria	o__Rhodobacterales	f__Rhodobacteraceae	g__Rubellimicrobium	0.787983	-0.707355			-0.785566
d__Bacteria	p__Proteobacteria	c__Alphaproteobacteria	o__Rhizobiales	o__Rhizobiales	o__Rhizobiales	0.78988	-0.849157			-0.655042	-0.57211
d__Bacteria	p__Proteobacteria	c__Alphaproteobacteria	o__Caulobacterales	f__Caulobacteraceae	g__Phenylobacterium	0.790145	-0.708121				-0.54314
d__Bacteria	p__Chloroflexi	c__TK10	o__TK10	f__TK10	g__TK10	0.795529	-0.617601			-0.548181		0.557534
d__Bacteria	p__Proteobacteria	c__Gammaproteobacteria	o__Burkholderiales	f__Comamonadaceae	g__Rivibacter	0.806806	-0.645884			-0.548181		0.735648
d__Bacteria	p__Planctomycetota	c__Planctomycetes	o__Isosphaerales	f__Isosphaeraceae	g__uncultured	0.80693	-0.646328		0.655342	-0.672079	-0.661377
d__Bacteria	p__Planctomycetota	c__Planctomycetes	o__Planctomycetales	f__Schlesneriaceae	g__Planctopirus	0.813379	-0.806387			-0.783196	-0.549814
d__Bacteria	p__Proteobacteria	c__Alphaproteobacteria	o__Caulobacterales	f__Hyphomonadaceae	g__Hyphomonas	0.818983	-0.779533			-0.55806	-0.59872
d__Bacteria	p__Proteobacteria	c__Gammaproteobacteria	o__Burkholderiales	f__TRA3-20	g__TRA3-20	0.81909	-0.765237			-0.73062	-0.622585
d__Bacteria	p__Verrucomicrobiota	c__Verrucomicrobiae	o__Opitutales	f__Opitutaceae	f__Opitutaceae	0.821484	-0.77933		0.613335	-0.620652	-0.577687
d__Bacteria	p__Proteobacteria	c__Gammaproteobacteria	o__Ga0077536	f__Ga0077536	g__Ga0077536	0.823147	-0.790155			-0.702694	-0.597403
d__Bacteria	p__Proteobacteria	c__Alphaproteobacteria	o__Rickettsiales	f__SM2D12	g__SM2D12	0.828373	-0.723943		0.636892	-0.606695	-0.653307
d__Bacteria	p__Proteobacteria	c__Alphaproteobacteria	o__Puniceispirillales	f__uncultured	g__uncultured	0.834137	-0.853053			-0.619195
d__Bacteria	p__Bacteroidota	c__Bacteroidia	o__Chitinophagales	f__uncultured	g__uncultured	0.837019	-0.784477			-0.618711	-0.600379
d__Bacteria	p__Bacteroidota	c__Bacteroidia	o__Sphingobacteriales	f__Sphingobacteriaceae	g__Pedobacter	0.839757	-0.87081			-0.720732	-0.637946
d__Bacteria	p__Planctomycetota	c__Phycisphaerae	o__Phycisphaerales	f__Phycisphaeraceae	g__SM1A02	0.840133	-0.807102			-0.69716
d__Bacteria	p__Planctomycetota	c__Planctomycetes	o__Pirellulales	f__Pirellulaceae	g__Pirellula	0.845038	-0.818388			-0.767614	-0.634406
d__Bacteria	p__Planctomycetota	c__Planctomycetes	o__Planctomycetales	f__Rubinisphaeraceae	g__SH-PL14	0.847402	-0.822501			-0.707642	-0.638539
d__Bacteria	p__Proteobacteria	c__Gammaproteobacteria	o__Burkholderiales	f__Comamonadaceae	f__Comamonadaceae	0.847723	-0.730368			-0.74786	-0.663509
d__Bacteria	p__Bacteroidota	c__Bacteroidia	o__Cytophagales	f__Microscillaceae	g__uncultured	0.851772	-0.82167			-0.588537	-0.58966
d__Bacteria	p__Proteobacteria	c__Alphaproteobacteria	o__Rhizobiales	f__Xanthobacteraceae	g__Pseudorhodoplanes	0.855913	-0.873745			-0.657804	-0.572874
d__Bacteria	p__Chloroflexi	c__Chloroflexia	o__Thermomicrobiales	f__JG30-KF-CM45	g__JG30-KF-CM45	0.858144	-0.816292			-0.730388	-0.616162
d__Bacteria	p__Proteobacteria	c__Gammaproteobacteria	o__Burkholderiales	f__Comamonadaceae	g__Hydrogenophaga	0.860341	-0.84194			-0.634875	-0.64862
d__Bacteria	p__Proteobacteria	c__Alphaproteobacteria	o__Caulobacterales	f__Hyphomonadaceae	g__Hirschia	0.86037	-0.883616			-0.739699	-0.567651
d__Bacteria	p__Acidobacteriota	c__Blastocatellia	o__Blastocatellales	f__Blastocatellaceae	f__Blastocatellaceae	0.864736	-0.793078			-0.745041	-0.573805
d__Bacteria	p__Planctomycetota	c__Planctomycetes	o__Pirellulales	f__Pirellulaceae	g__uncultured	0.865511	-0.792884			-0.66946	-0.619165
d__Bacteria	p__Proteobacteria	c__Alphaproteobacteria	o__Caulobacterales	f__Hyphomonadaceae	g__SWB02	0.869834	-0.856779			-0.837786	-0.685309
d__Bacteria	p__Patescibacteria	c__Dojkabacteria	o__Dojkabacteria	f__Dojkabacteria	g__Dojkabacteria	0.872584	-0.677967			-0.644866	-0.647772
d__Bacteria	p__Proteobacteria	c__Alphaproteobacteria	o__Acetobacterales	f__Acetobacteraceae	f__Acetobacteraceae	0.873453	-0.761761			-0.73873
d__Bacteria	p__Acidobacteriota	c__Acidobacteriae	c__Acidobacteriae	c__Acidobacteriae	c__Acidobacteriae	0.87931	-0.868423			-0.731929	-0.573722
d__Bacteria	p__Planctomycetota	c__Planctomycetes	o__Gemmatales	f__Gemmataceae	g__Fimbriiglobus	0.879444	-0.870074			-0.829762	-0.624361
d__Bacteria	p__Proteobacteria	c__Alphaproteobacteria	o__Caulobacterales	f__Hyphomonadaceae	g__uncultured	0.880201	-0.892028			-0.777389	-0.587837
d__Bacteria	p__Chloroflexi	c__Anaerolineae	o__Anaerolineales	f__Anaerolineaceae	g__uncultured	0.880868	-0.794645			-0.657895	-0.664715
d__Bacteria	p__Proteobacteria	c__Alphaproteobacteria	o__Rhizobiales	f__Xanthobacteraceae	g__Rhodopseudomonas	0.88425	-0.86385			-0.778982	-0.736178
d__Bacteria	p__Proteobacteria	c__Alphaproteobacteria	o__Caulobacterales	f__Hyphomonadaceae	g__Maricaulis	0.88472	-0.883371			-0.775981	-0.610204
d__Bacteria	p__Planctomycetota	c__Planctomycetes	o__Gemmatales	f__Gemmataceae	g__uncultured	0.885947	-0.908798			-0.764233	-0.712585
d__Bacteria	p__Proteobacteria	c__Alphaproteobacteria	o__Rhizobiales	f__Rhizobiaceae	f__Rhizobiaceae	0.889395	-0.782656			-0.79618	-0.613676
d__Bacteria	p__Planctomycetota	c__Phycisphaerae	o__Tepidisphaerales	f__WD2101_soil_group	g__WD2101_soil_group	0.889834	-0.840278			-0.835093	-0.670147
d__Bacteria	p__SAR324_clade(Marine_group_B)	c__SAR324_clade(Marine_group_B)	o__SAR324_clade(Marine_group_B)	f__SAR324_clade(Marine_group_B)	g__SAR324_clade(Marine_group_B)	0.890566	-0.867085			-0.700399	-0.699778
d__Bacteria	p__Proteobacteria	c__Alphaproteobacteria	o__Ferrovibrionales	f__Ferrovibrionales	g__Taonella	0.892236	-0.881934			-0.667976	-0.636358
d__Bacteria	p__Proteobacteria	c__Gammaproteobacteria	o__R7C24	f__R7C24	g__R7C24	0.899524	-0.893366			-0.740632	-0.621004
d__Bacteria	p__Bacteroidota	c__Rhodothermia	o__Balneolales	f__Balneolaceae	g__uncultured	0.912777	-0.841234			-0.752455	-0.658365
d__Bacteria	p__Proteobacteria	c__Gammaproteobacteria	o__Burkholderiales	f__Rhodocyclaceae	g__Azoarcus	0.913045	-0.844445			-0.778457	-0.705217
d__Bacteria	p__Bacteroidota	c__Bacteroidia	o__Cytophagales	f__Spirosomaceae	g__Persicitalea	0.914572	-0.801507			-0.672079	-0.597129
d__Bacteria	p__Proteobacteria	c__Alphaproteobacteria	o__Micropepsales	f__Micropepsaceae	g__uncultured	0.918252	-0.877645			-0.624243	-0.62693
d__Bacteria	p__Bacteroidota	c__Bacteroidia	o__Chitinophagales	f__Chitinophagaceae	g__Edaphobaculum	0.919117	-0.791259			-0.721004	-0.675994
d__Bacteria	p__Chloroflexi	c__Anaerolineae	o__SBR1031	f__A4b	g__A4b	0.937175	-0.895222			-0.763926	-0.718147
d__Bacteria	p__Proteobacteria	c__Alphaproteobacteria	o__Rhizobiales	f__Hyphomicrobiaceae	g__Hyphomicrobium	0.93875	-0.926307			-0.763926	-0.713469
d__Bacteria	p__Proteobacteria	c__Alphaproteobacteria	o__Azospirillales	f__Azospirillales_Incertae_Sedis	g__Stella	0.939603	-0.819182			-0.745924	-0.618182
d__Bacteria	p__Actinobacteriota	c__Actinobacteria	o__Corynebacteriales	f__Mycobacteriaceae	g__Mycobacterium	0.948582	-0.905688			-0.764233	-0.735207
d__Bacteria	p__Chloroflexi	c__Anaerolineae	o__Caldilineales	f__Caldilineaceae	g__uncultured	0.960416	-0.837787			-0.73873	-0.685048
d__Bacteria	p__Proteobacteria	c__Gammaproteobacteria	o__Burkholderiales	f__Alcaligenaceae	g__uncultured		-0.664296
d__Bacteria	p__Proteobacteria	c__Gammaproteobacteria	o__Xanthomonadales	f__Rhodanobacteraceae	g__Aquimonas		-0.610271		0.769826
d__Bacteria	p__Proteobacteria	c__Alphaproteobacteria	o__Rhizobiales	f__Labraceae	g__Labrys		-0.602539
d__Bacteria	p__Proteobacteria	c__Alphaproteobacteria	o__Rhizobiales	f__Rhizobiales_Incertae_Sedis	g__Bauldia		-0.581636
d__Bacteria	p__Proteobacteria	c__Gammaproteobacteria	o__Burkholderiales	f__Alcaligenaceae	g__Verticiella		-0.577239			-0.623274
d__Bacteria	p__Firmicutes	c__Clostridia	o__Peptostreptococcales-Tissierellales	f__Fusibacteraceae	g__Fusibacter		-0.547649
d__Bacteria	p__Proteobacteria	c__Gammaproteobacteria	o__Pseudomonadales	f__Pseudomonadaceae	g__Pseudomonas		0.582926
d__Bacteria	p__Bacteroidota	c__Bacteroidia	o__Bacteroidales	f__Rikenellaceae	g__Rikenellaceae		0.58557
d__Bacteria	p__Proteobacteria	c__Gammaproteobacteria	o__Alteromonadales	f__Idiomarinaceae	g__Idiomarina		0.590349
d__Bacteria	p__Fibrobacterota	c__Fibrobacteria	o__Fibrobacterales	f__Fibrobacteraceae	g__uncultured		0.591757				0.555986
d__Bacteria	p__Proteobacteria	c__Gammaproteobacteria	o__Pseudomonadales	f__Pseudomonadaceae	g__Oblitimonas		0.606961
d__Bacteria	p__Firmicutes	c__Clostridia	o__Eubacteriales	f__Garciellaceae	g__Irregularibacter		0.619731				0.607806
d__Bacteria	p__Synergistota	c__Synergistia	o__Synergistales	f__Synergistaceae	g__uncultured		0.628532
d__Bacteria	p__Bacteroidota	c__Bacteroidia	o__Bacteroidales	f__Rikenellaceae	g__Alistipes		0.655741
d__Bacteria	p__Proteobacteria	c__Gammaproteobacteria	o__Burkholderiales	f__Alcaligenaceae	g__Pusillimonas			-0.732689	0.58987			-0.646028
d__Bacteria	p__Proteobacteria	c__Alphaproteobacteria	o__Rhodobacterales	f__Rhodobacteraceae	g__Rhodobacter			-0.699059
d__Bacteria	p__Bacteroidota	c__Bacteroidia	c__Bacteroidia	c__Bacteroidia	c__Bacteroidia			-0.676083	0.618403
d__Bacteria	p__Proteobacteria	c__Gammaproteobacteria	o__Burkholderiales	f__Rhodocyclaceae	g__Zoogloea			-0.604734
d__Bacteria	d__Bacteria	d__Bacteria	d__Bacteria	d__Bacteria	d__Bacteria			-0.556098
d__Bacteria	p__Firmicutes	c__Clostridia	o__Clostridia	f__Gracilibacteraceae	f__Gracilibacteraceae			-0.549257
d__Bacteria	p__Firmicutes	c__Clostridia	o__Clostridiales	f__Clostridiaceae	g__Clostridium_sensu_stricto_1			0.60205
d__Bacteria	p__Firmicutes	c__Bacilli	o__Bacillales	f__Planococcaceae	g__Lysinibacillus			0.643237				0.643635
d__Bacteria	p__Firmicutes	c__Clostridia	o__Clostridia	f__Hungateiclostridiaceae	g__Ruminiclostridium				-0.679366		0.623999
d__Bacteria	p__Bacteroidota	c__Bacteroidia	o__SM1A07	f__SM1A07	g__SM1A07				0.596888
d__Bacteria	p__Deferribacterota	c__Deferribacteres	o__Deferribacterales	f__Deferribacteraceae	g__Geovibrio				0.612393
d__Bacteria	p__Bacteroidota	c__Bacteroidia	o__Sphingobacteriales	f__Lentimicrobiaceae	g__Lentimicrobium				0.625755
d__Bacteria	p__Proteobacteria	c__Alphaproteobacteria	o__Defluviicoccales	f__uncultured	g__uncultured				0.627343	-0.663724
d__Bacteria	p__Verrucomicrobiota	c__Verrucomicrobiae	o__Verrucomicrobiales	f__Rubritaleaceae	g__Luteolibacter				0.64432
d__Bacteria	p__Proteobacteria	c__Alphaproteobacteria	o__Acetobacterales	f__Acetobacteraceae	g__Roseomonas				0.662511
d__Bacteria	p__Verrucomicrobiota	c__Verrucomicrobiae	o__Opitutales	f__Opitutaceae	g__Lacunisphaera				0.694659	-0.599239
d__Bacteria	p__Acidobacteriota	c__Acidobacteriae	o__Acidobacteriae	f__Acidobacteriae	g__Paludibaculum							-0.551024
d__Bacteria	p__Bacteroidota	c__Bacteroidia	o__Sphingobacteriales	f__Sphingobacteriaceae	g__Sphingobacterium							0.544429
d__Bacteria	p__Proteobacteria	c__Gammaproteobacteria	o__Xanthomonadales	f__Xanthomonadaceae	g__Stenotrophomonas							0.558986
d__Bacteria	p__Bacteroidota	c__Bacteroidia	o__Sphingobacteriales	f__Sphingobacteriaceae	g__Nubsella							0.595569
d__Bacteria	p__Firmicutes	c__Clostridia	o__Clostridiales	f__Clostridiaceae	g__Proteiniclasticum							0.617384
d__Bacteria	p__Proteobacteria	c__Alphaproteobacteria	o__Sphingomonadales	f__Sphingomonadaceae	g__Sphingopyxis						0.546993
d__Bacteria	p__Proteobacteria	c__Alphaproteobacteria	o__Rhizobiales	f__Xanthobacteraceae	g__Rhodoplanes						0.55137
d__Bacteria	p__Firmicutes	c__Bacilli	o__Erysipelotrichales	f__Erysipelotrichaceae	g__Catenisphaera						0.558456
d__Bacteria	p__Firmicutes	c__Clostridia	o__Oscillospirales	f__Oscillospiraceae	f__Oscillospiraceae						0.584743
d__Bacteria	p__Campilobacterota	c__Campylobacteria	o__Campylobacterales	f__Campylobacteraceae	g__Campylobacter						0.636365
d__Bacteria	p__Bacteroidota	c__Bacteroidia	o__Chitinophagales	f__Chitinophagaceae	g__Flavihumibacter						0.647267
d__Bacteria	p__Proteobacteria	c__Alphaproteobacteria	o__Sphingomonadales	f__Sphingomonadaceae	g__Sphingomonas						0.667424
d__Bacteria	p__Acidobacteriota	c__Vicinamibacteria	o__Vicinamibacterales	f__uncultured	g__uncultured					-0.597221
d__Bacteria	p__Proteobacteria	c__Gammaproteobacteria	o__Xanthomonadales	f__Xanthomonadaceae	g__Lysobacter					0.677428
